# Supplementary material
Source: publisher figshare collection journal article supplement (https://plos.figshare.com/articles/dataset/_/138191)
Supplement: Supplementary file 1 [file 1 › Figure_S1.pdf]

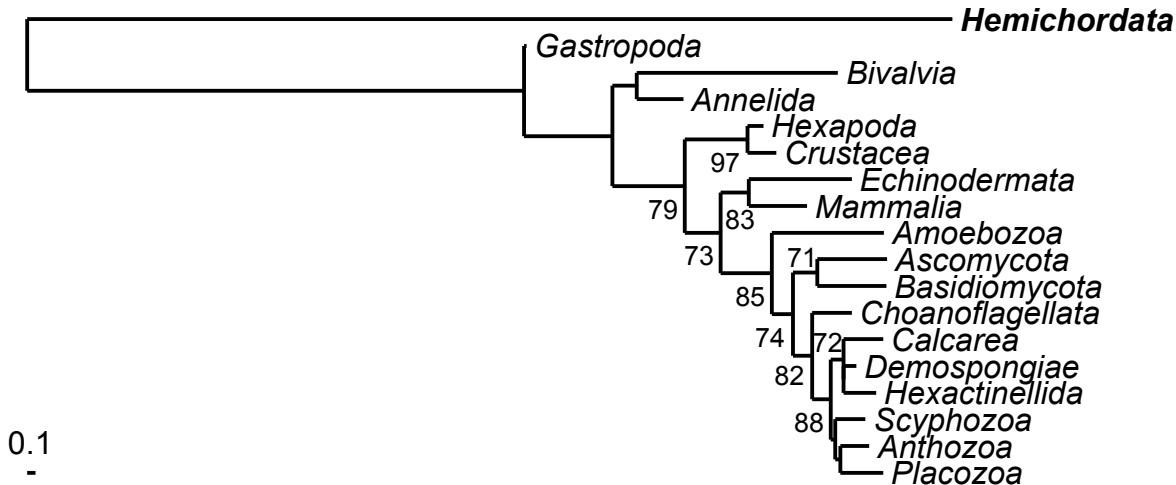

### Figure S1: Phylogeny of the AT6 gene.

The alignment of Schierwater et al. was used to infer a single gene phylogeny with RAxML (LG+F+ $\Gamma$  model, 100 fast bootstrap replicates). The highly divergent sequence of Hemichordata (in bold) is non homologous.
