# Supplementary material
Source: publisher figshare collection journal article supplement (https://plos.figshare.com/articles/dataset/_/138191)
Supplement: Supplementary file 1 [file 1 › Figure_S2.pdf]

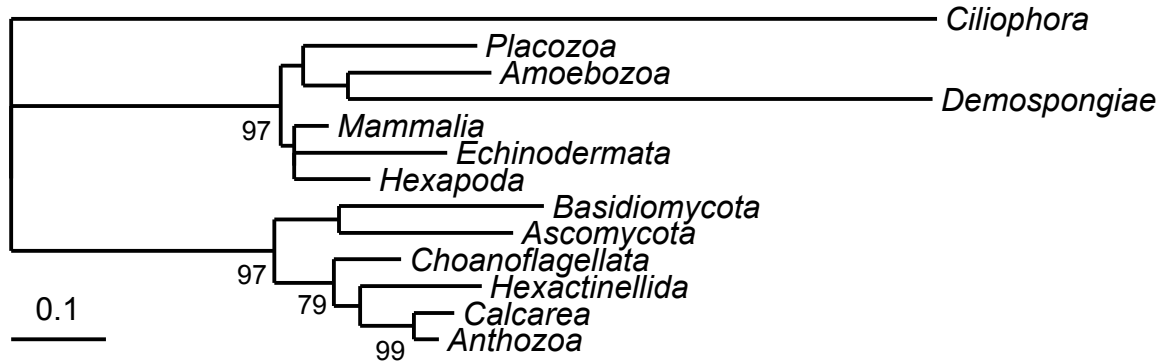

### Figure S2: Phylogeny of the CDC gene.

The alignment of Schierwater et al. was used to infer a single gene phylogeny with RAxML (LG+F+Γ model, 100 fast bootstrap replicates). Two different paralogs (*cdc42* and *rac1*) have clearly been mixed. The Ciliophora sequence could represent a third paralog.
