# Supplementary material
Source: publisher figshare collection journal article supplement (https://plos.figshare.com/articles/dataset/_/138191)
Supplement: Supplementary file 1 [file 1 › Figure_S4.pdf]

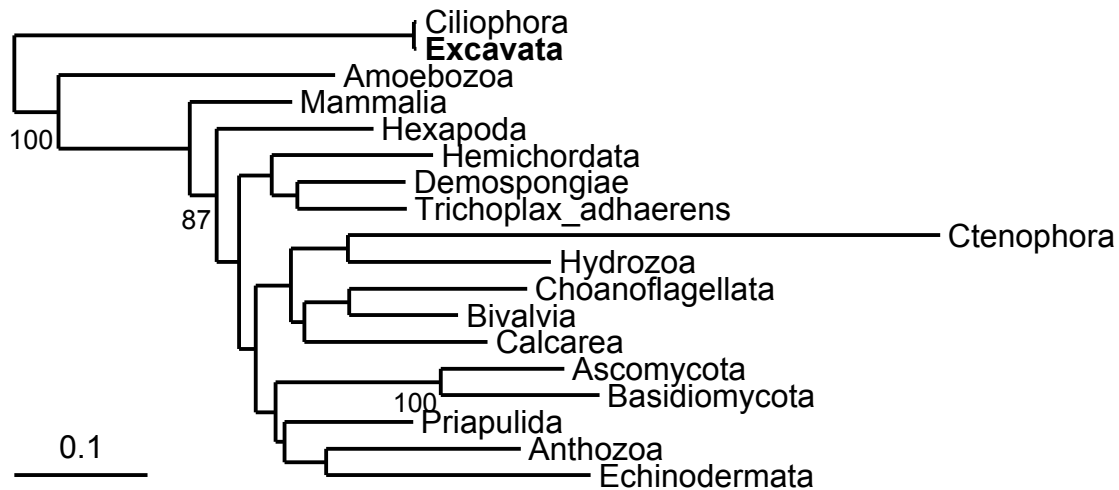

### Figure S4: Phylogeny of the EF1 gene.

The alignment of Schierwater et al. was used to infer a single gene phylogeny with RAXML (LG+F+ $\Gamma$  model, 100 fast bootstrap replicates). The Excavata sequence (in bold) is erroneously identical to the Ciliophora sequence.
