# Supplementary material
Source: publisher figshare collection journal article supplement (https://plos.figshare.com/articles/dataset/_/138191)
Supplement: Supplementary file 1 [file 1 › Figure_S5.pdf]

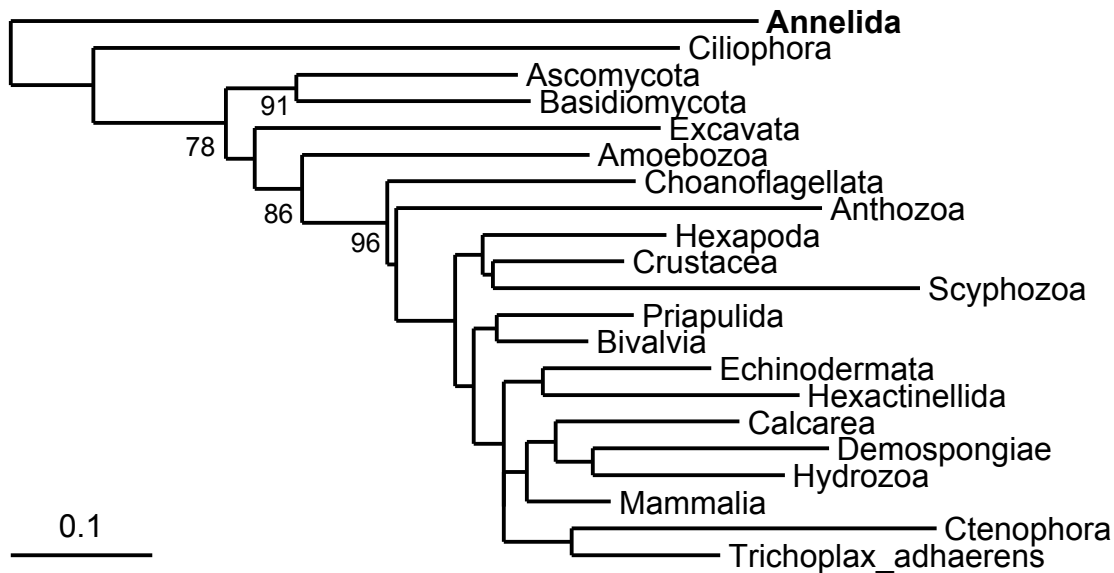

**Figure S5: Phylogeny of the H70 gene.**

The alignment of Schierwater et al. was used to infer a single gene phylogeny with RAxML (LG+F+ $\Gamma$  model, 100 fast bootstrap replicates). The Annelida sequence (in bold) belongs to a distinct paralogous family, the ER form of hsp70.
