# Supplementary material
Source: publisher figshare collection journal article supplement (https://plos.figshare.com/articles/dataset/_/138191)
Supplement: Supplementary file 1 [file 1 › Figure_S6.pdf]

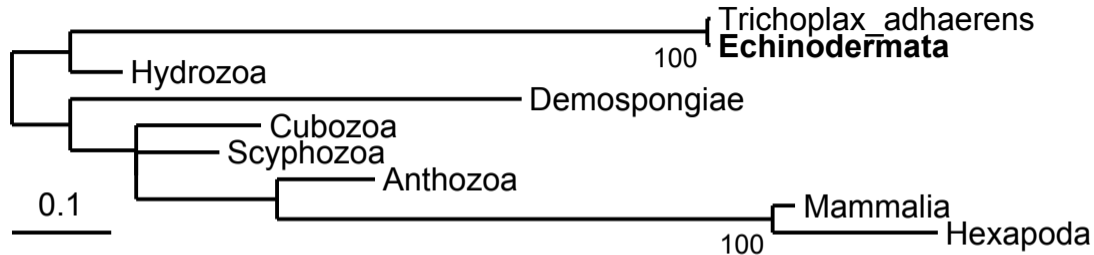

### Figure S6: Phylogeny of the PAX gene.

The alignment of Schierwater et al. was used to infer a single gene phylogeny with RAxML (LG+F+Γ model, 100 fast bootstrap replicates). The Echinodermata sequence (in bold) is erroneously identical to the Placozoa sequence. Moreover, orthology is difficult to assess.
