# Supplementary material
Source: publisher figshare collection journal article supplement (https://plos.figshare.com/articles/dataset/_/138191)
Supplement: Supplementary file 1 [file 1 › Figure_S7.pdf]

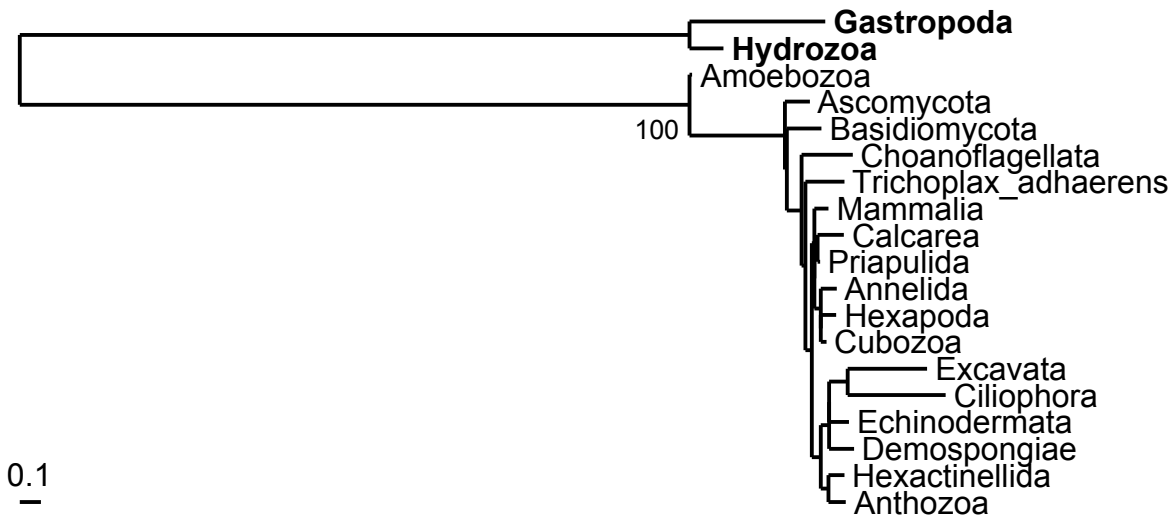

### Figure S7: Phylogeny of the RAS gene.

The alignment of Schierwater et al. was used to infer a single gene phylogeny with RAxML (LG+F+I model, 100 fast bootstrap replicates). The Gastropoda and Hydrozoa sequences (in bold) belong to a distinct and very distantly related paralogous family.
