# Supplementary material
Source: publisher figshare collection journal article supplement (https://plos.figshare.com/articles/dataset/_/138191)
Supplement: Supplementary file 1 [file 1 › Figure_S8.pdf]

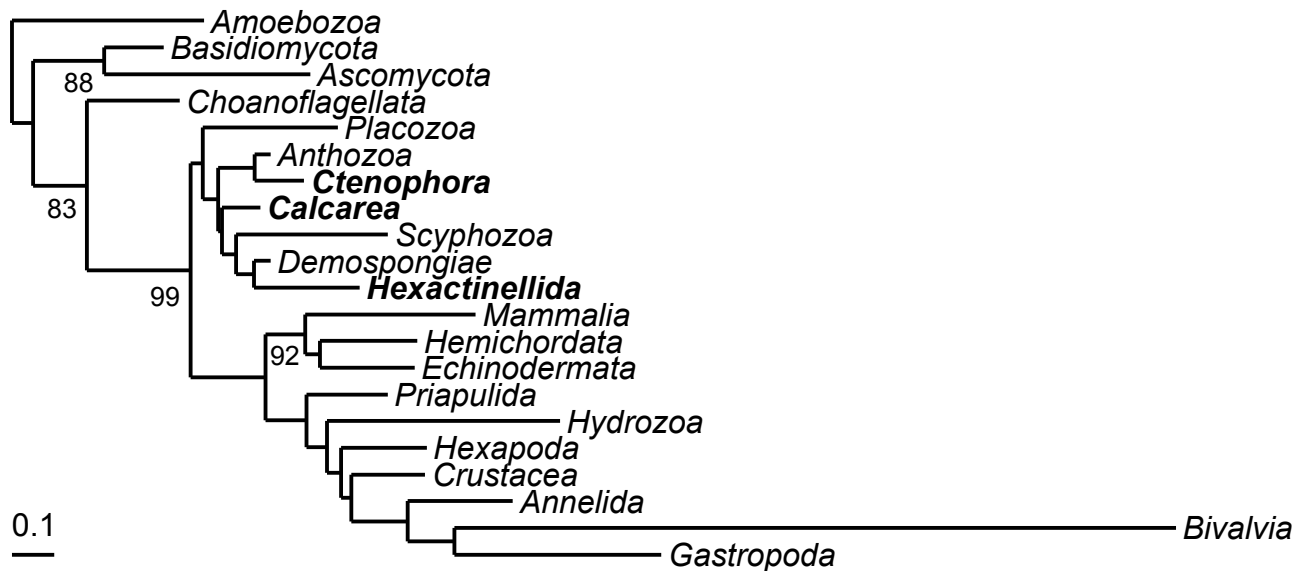

### Figure S8: Phylogeny of the CO2 gene.

The alignment of Schierwater et al. was used to infer a single gene phylogeny with RAxML (LG+F+ $\Gamma$  model, 100 fast bootstrap replicates). The Calcare and Hexactinellida sequences are misidentified and are actually from demosponges (see Fig. S1). Similarly, the Ctenophora sequence is almost identical to the Anthozoa sequence (thus likely also a misidentification). All three sequences are shown in bold.
