# Supplementary material
Source: publisher figshare collection journal article supplement (https://plos.figshare.com/articles/dataset/_/138191)
Supplement: Supplementary file 1 [file 1 › Figure_S10.pdf]

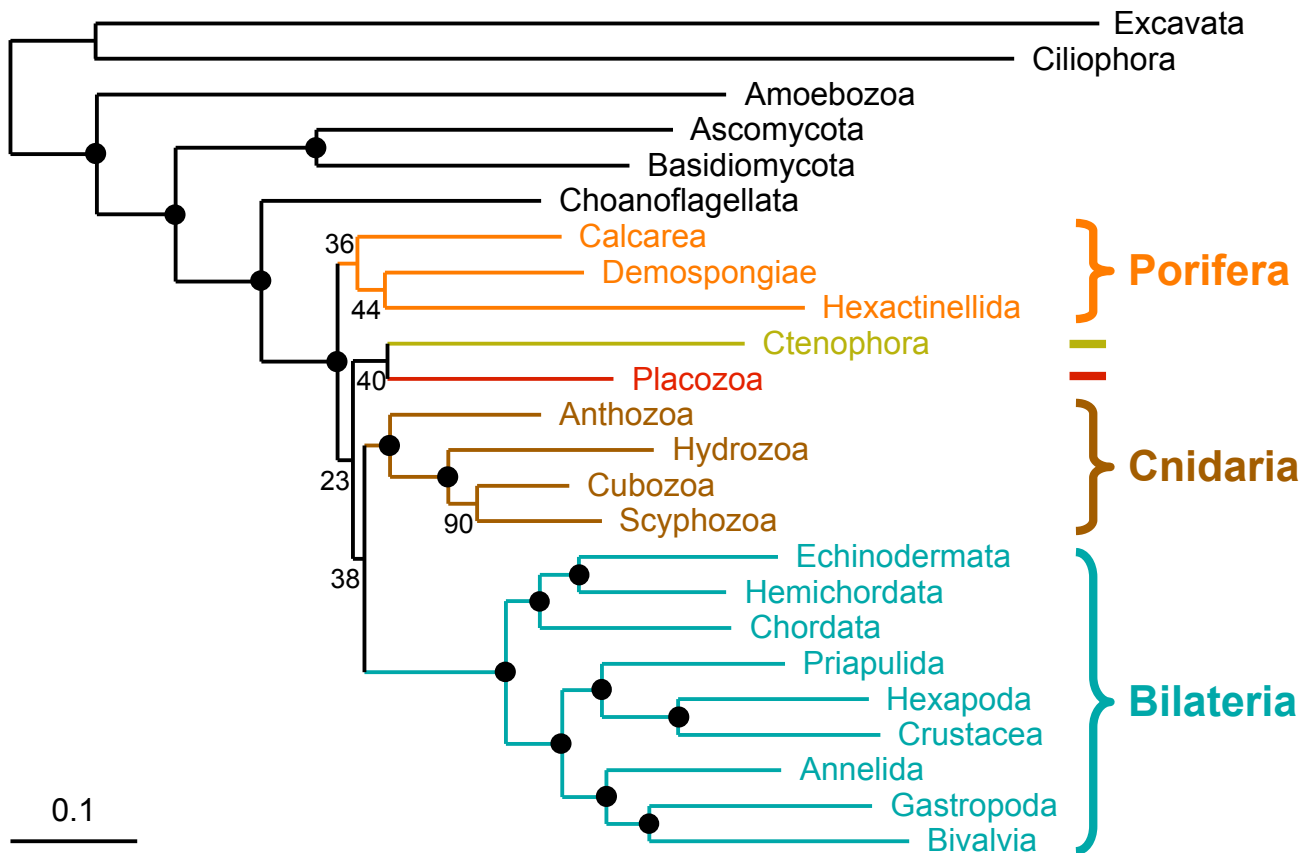

**Figure S10: Analysis of the revised Schierwater et al. dataset.**

Numerous discrepancies were corrected in the alignments (Table S1) and a few genes were discarded due to dubious orthology assignment; 14,112 unambiguously aligned positions were retained. The tree was inferred as in the original study, i.e., using RAXML with a GTR+ $\Gamma$  model for nucleotide sequences and a LG+F+ $\Gamma$  model for protein sequences.
