# Supplementary material
Source: publisher figshare collection journal article supplement (https://plos.figshare.com/articles/dataset/_/138191)
Supplement: Supplementary file 1 [file 1 › Figure_S12.pdf]

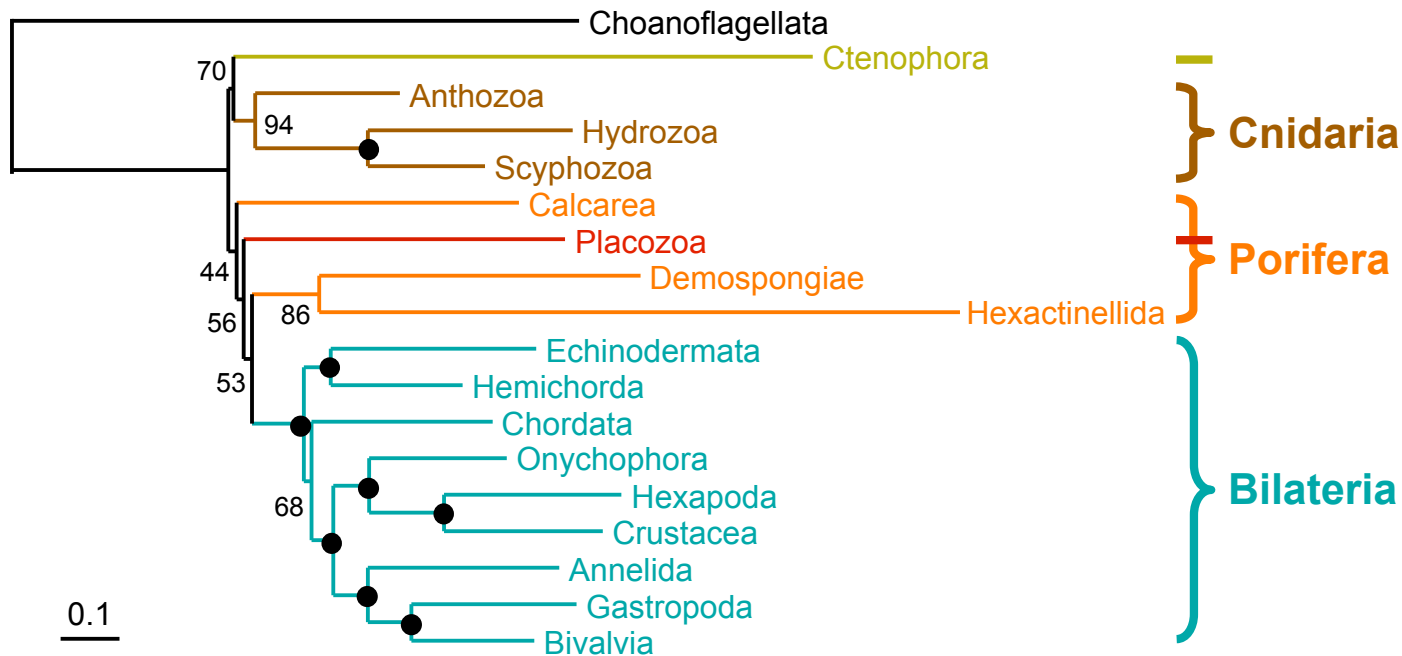

**Figure S12: Reanalysis of the Philippe et al. dataset with a reduced taxon sampling.**

Both gene selection and inference method (PhyloBayes using the CAT+ $\Gamma$  model) were exactly the same as in the original study. There are 128 genes and 30,257 unambiguously aligned positions.
