# Supplementary material
Source: publisher figshare collection journal article supplement (https://plos.figshare.com/articles/dataset/_/138191)
Supplement: Supplementary file 1 [file 1 › Figure_S13.pdf]

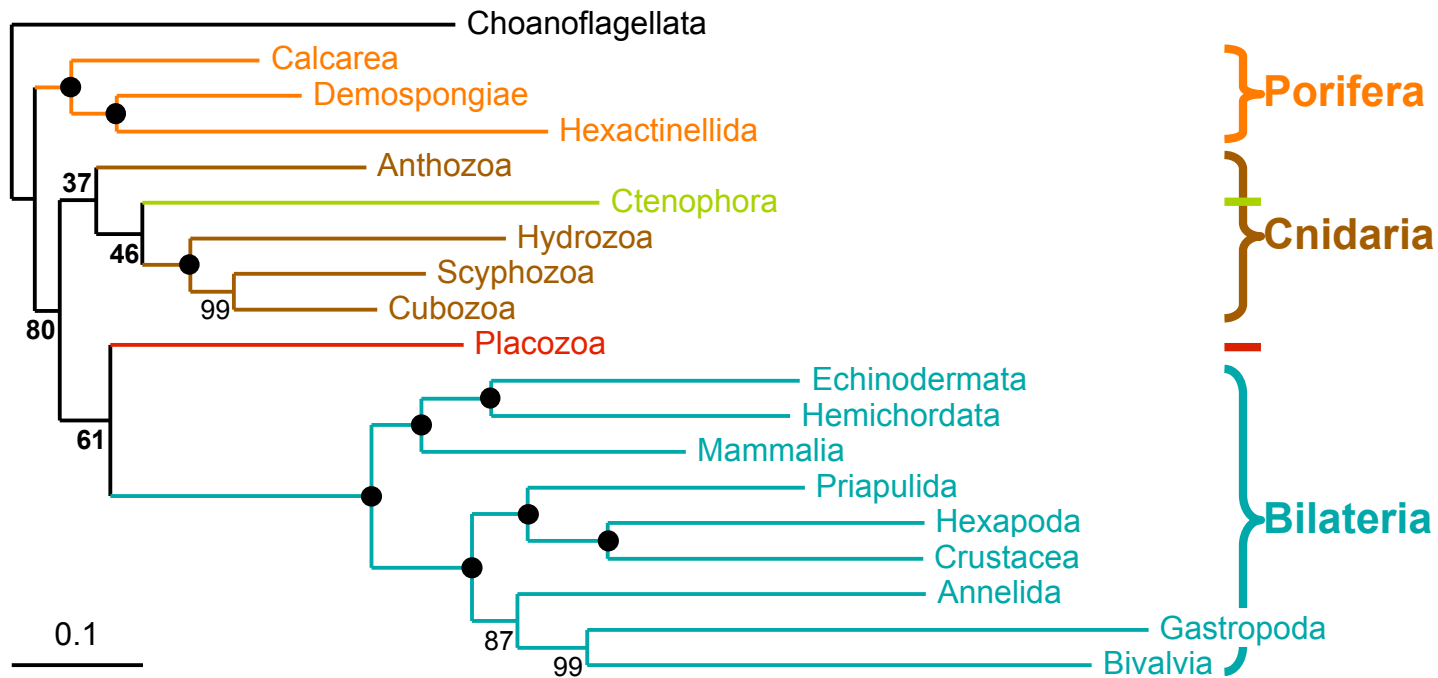

**Figure S13: Reanalysis of the original Schierwater et al. alignment with only the closest outgroup (Choanoflagellata).**

The 17,101 positions of the original alignment (morphological and structural characters have been excluded) were analysed with the same model as in the original study (i.e., RAxML with a mixed GTR+ $\Gamma$  and LG+F+ $\Gamma$  model, 100 fast bootstrap replicates). Branches supported at 100% are indicated by a bullet.
