# Supplementary material
Source: publisher figshare collection journal article supplement (https://plos.figshare.com/articles/dataset/_/138191)
Supplement: Supplementary file 1 [file 1 › Figure_S14.pdf]

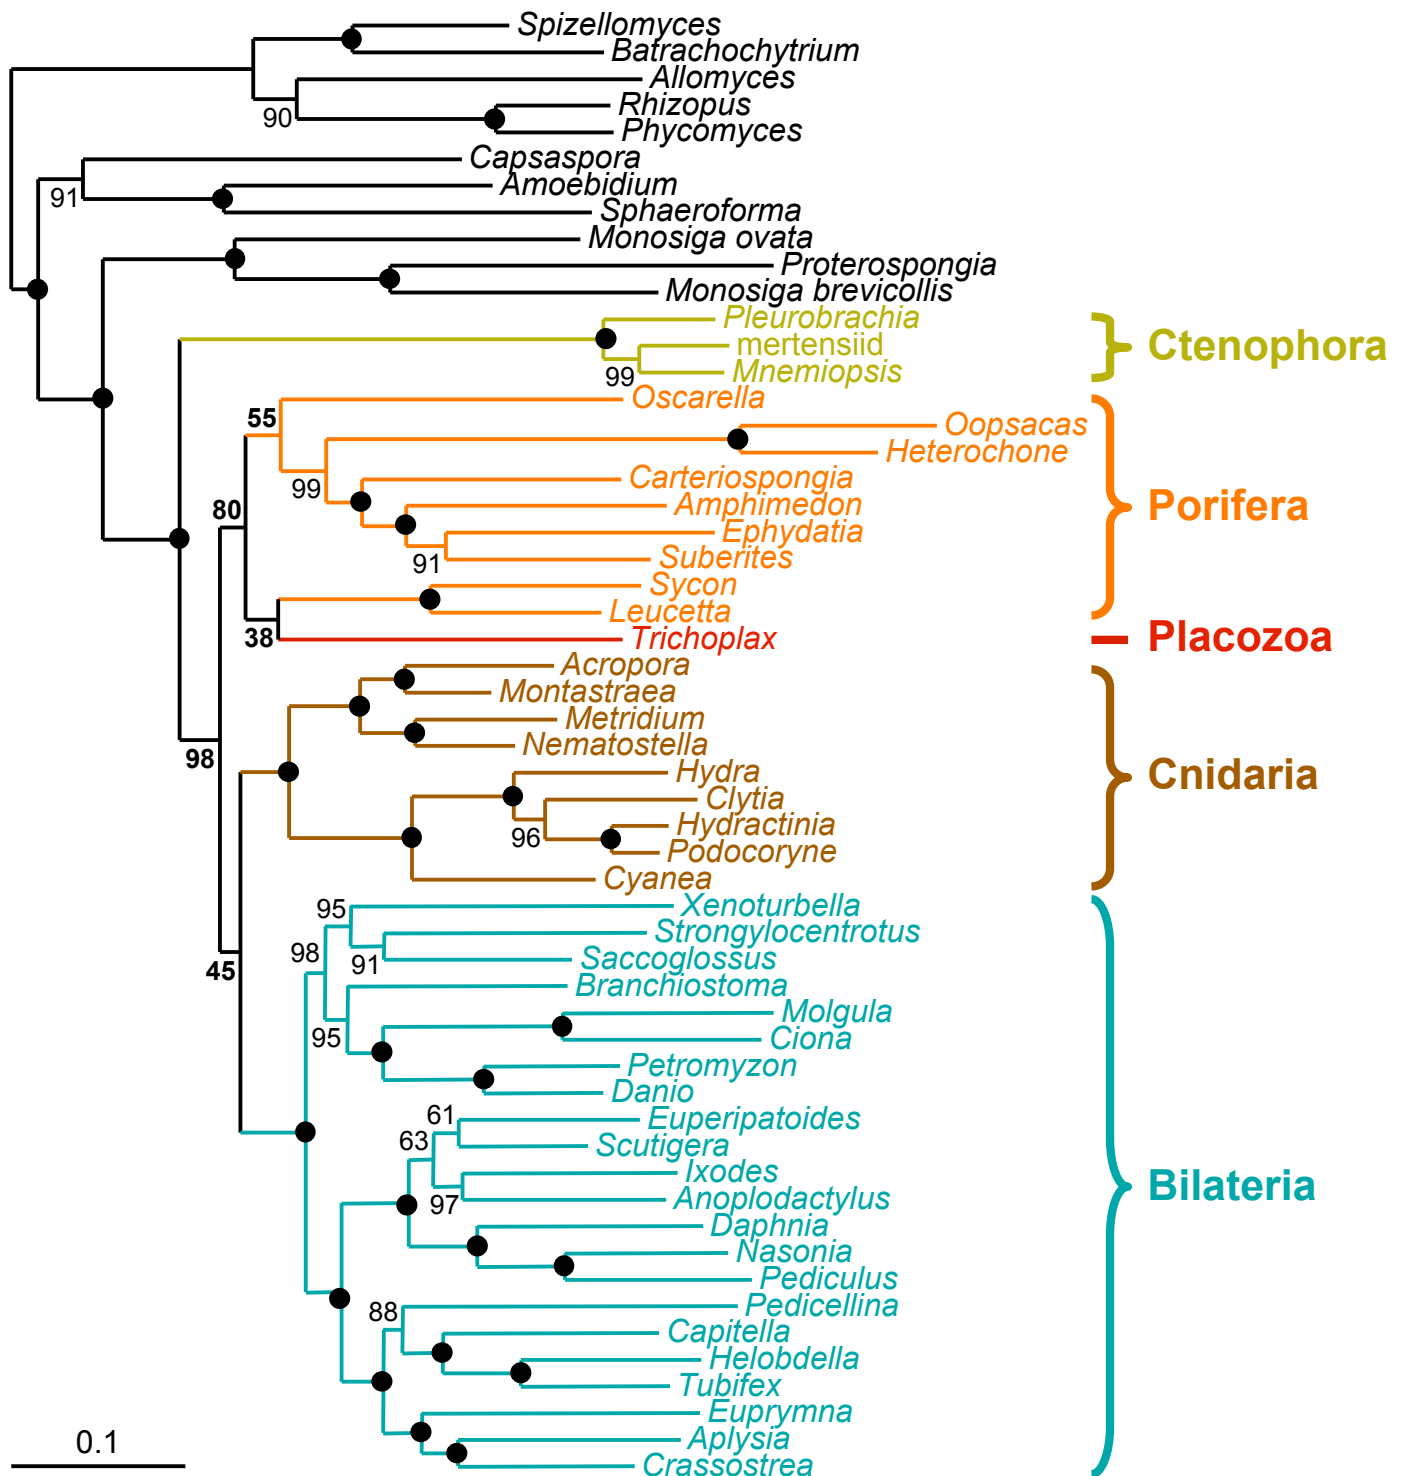

**Figure S14: Reanalysis of the Philippe et al. dataset with a less complex model.**

The original dataset was reanalysed using RAXML with the WAG+F+ $\Gamma$  model, which has a less good fit than the CAT+ $\Gamma$  model used in the original study.
