# Supplementary material
Source: publisher figshare collection journal article supplement (https://plos.figshare.com/articles/dataset/_/138191)
Supplement: Supplementary file 1 [file 1 › Table_S1.pdf]

**Table S1. List of errors detected in the dataset of Schierwater et al. [1].**

Gene names are those of the original study. 'Contamination' includes both biological and *in silico* contaminations, as we cannot determine the origin of reported errors.

| Gene   | Frameshift                                                        | Point mutations      | Paralogy                                                                                     | Contamination                                                                                                |
|--------|-------------------------------------------------------------------|----------------------|----------------------------------------------------------------------------------------------|--------------------------------------------------------------------------------------------------------------|
| bp143  |                                                                   |                      |                                                                                              |                                                                                                              |
| bp156  | Choanoflagellata (70),<br>Hemichordata (45)                       | Hydrozoa (~10)       |                                                                                              |                                                                                                              |
| bp169  | Choanoflagellata (~15),<br>Chromalveolata (15),<br>Hydrozoa (~10) |                      |                                                                                              |                                                                                                              |
| bp174  |                                                                   |                      |                                                                                              |                                                                                                              |
| bp179  | Choanoflagellata (~10),<br>Echinodermata (10)                     | Hydrozoa (~10)       |                                                                                              |                                                                                                              |
| bp184  | Bivalvia (55), Hydrozoa (40)                                      |                      |                                                                                              |                                                                                                              |
| bp186  |                                                                   |                      |                                                                                              |                                                                                                              |
| bp193  |                                                                   |                      |                                                                                              |                                                                                                              |
| bp199  |                                                                   |                      |                                                                                              |                                                                                                              |
| bp200  |                                                                   | Choanoflagellata (8) |                                                                                              |                                                                                                              |
| bp211  |                                                                   |                      |                                                                                              |                                                                                                              |
| bp213  |                                                                   | Hydrozoa (18)        |                                                                                              |                                                                                                              |
| bp225  |                                                                   |                      |                                                                                              |                                                                                                              |
| bp232  | Gastropoda (~10)                                                  |                      |                                                                                              |                                                                                                              |
| bp233  |                                                                   |                      |                                                                                              |                                                                                                              |
| bp235  | Echinodermata (~100)                                              |                      |                                                                                              |                                                                                                              |
| bp242  |                                                                   |                      |                                                                                              |                                                                                                              |
| bp243  |                                                                   |                      |                                                                                              |                                                                                                              |
| ACT    |                                                                   |                      |                                                                                              |                                                                                                              |
| BRA    |                                                                   |                      |                                                                                              |                                                                                                              |
| BTU    |                                                                   |                      |                                                                                              |                                                                                                              |
| CDC    |                                                                   |                      | 2 or 3 groups of paralogs<br>very short, some are non<br>homologous                          |                                                                                                              |
| DCR    |                                                                   |                      |                                                                                              |                                                                                                              |
| EF1    |                                                                   | Choanoflagellata (5) |                                                                                              | Excavata=Tetrahymena                                                                                         |
| H70    |                                                                   |                      | all sequences are the<br>cytoplasmic HSP70, but<br>Annelida sequence which<br>is the ER form |                                                                                                              |
| NAK    |                                                                   |                      |                                                                                              |                                                                                                              |
| PAX    |                                                                   |                      | mix of paralogs<br>2 paralogs (Gastropoda<br>and hydrozoa)                                   | Echinodermata=Trichoplax<br>Cubozoa=Insecta                                                                  |
| RAS    |                                                                   |                      |                                                                                              |                                                                                                              |
| RB2    |                                                                   |                      |                                                                                              |                                                                                                              |
| RP3    |                                                                   |                      | Anthozoa is a paralog                                                                        |                                                                                                              |
| TF1    |                                                                   |                      |                                                                                              |                                                                                                              |
| rna12S |                                                                   |                      |                                                                                              |                                                                                                              |
| rna16S |                                                                   |                      |                                                                                              |                                                                                                              |
| rna18S |                                                                   |                      |                                                                                              |                                                                                                              |
| rna28S |                                                                   |                      |                                                                                              | Hexactinellida (several<br>misalignments)                                                                    |
| rna58S |                                                                   |                      | Basidiomycota=non<br>homologous<br>Hemichordata=non<br>homologous                            | Hexactinellida=Demospongiae,<br>Calcarea=Demospongiae                                                        |
| AT6    |                                                                   |                      |                                                                                              |                                                                                                              |
| AT8    |                                                                   |                      |                                                                                              |                                                                                                              |
| CO1    |                                                                   |                      |                                                                                              | Hexactinellida=Demospongiae<br>Ctenophora=Anthozoa,<br>Hexactinellida=Demospongiae,<br>Calcarea=Demospongiae |
| CO2    |                                                                   |                      |                                                                                              | Hexactinellida=Demospongiae,<br>Calcarea=Demospongiae                                                        |
| CO3    |                                                                   | Echinodermata (23)   |                                                                                              | Hexactinellida=Demospongiae,<br>Calcarea=Demospongiae                                                        |
| CYB    |                                                                   |                      |                                                                                              | Hexactinellida=Demospongiae                                                                                  |
| N4L    |                                                                   |                      |                                                                                              | Hexactinellida=Demospongiae                                                                                  |
| ND1    | Gastropoda                                                        | Gastropoda(6)        |                                                                                              | Hexactinellida=Demospongiae                                                                                  |
| ND2    |                                                                   |                      |                                                                                              | Hexactinellida=Demospongiae                                                                                  |
| ND3    |                                                                   |                      |                                                                                              | Hexactinellida=Demospongiae                                                                                  |
| ND4    |                                                                   |                      |                                                                                              | Hexactinellida=Demospongiae                                                                                  |
| ND5    | Hexactinellida (~30),<br>Trichoplax (~15)                         | Echinodermata (~20)  |                                                                                              | Hexactinellida=Demospongiae                                                                                  |
| ND6    |                                                                   |                      |                                                                                              | Hexactinellida=Demospongiae                                                                                  |
