# Supplementary material
Source: publisher figshare collection journal article supplement (https://plos.figshare.com/articles/dataset/_/138191)
Supplement: Supplementary file 1 [file 1 › Table_S2.pdf]

**Table S2. List of errors detected in the dataset of Dunn et al. [2].**

Gene names are those of the original study. ‘Contamination’ includes both biological and *in silico* contaminations, as we cannot determine the origin of reported errors. However, we suspect that the biological material was contaminated as contaminating sequences exclusively belong to parasites. Cases of paralogy are often detected for species not used in the original study, especially for Bilateria, and therefore did not affect the original analysis. Misassignment of paralogs as orthologs is extremely rare and constitutes a negligible issue for this dataset.

| gene      | frameshift                                                                  | point mutations                         | paralogy                                                                                                                        | contamination/alignment                                                           |
|-----------|-----------------------------------------------------------------------------|-----------------------------------------|---------------------------------------------------------------------------------------------------------------------------------|-----------------------------------------------------------------------------------|
| tribe1006 |                                                                             | Branchiostoma(5)                        |                                                                                                                                 |                                                                                   |
| tribe1007 | Acanthosciura(5), Crassostrea (~50)                                         |                                         |                                                                                                                                 |                                                                                   |
| tribe1009 | Homo(20), Macrostomum(40), Echinococcus(10), Trichinella(10), Oscarella(30) |                                         |                                                                                                                                 |                                                                                   |
| tribe1012 |                                                                             |                                         |                                                                                                                                 |                                                                                   |
| tribe1013 | Echinoderes(4, perhaps more)                                                | Branchiostoma(1)                        |                                                                                                                                 |                                                                                   |
| tribe1015 | Macrostomum(90), Euprymna(5)                                                | Boophilus(2)                            | Heterodera+Meloidogyne(divergent copies, in-paralog)                                                                            |                                                                                   |
| tribe1020 |                                                                             |                                         | Daphnia (out-paralog)                                                                                                           |                                                                                   |
| tribe1026 | Crassostrea(50), Euprymna(20)                                               |                                         | Myzus (in-paralog)                                                                                                              | Scutigera (~50 misaligned), Euprymna (~50 misaligned)                             |
| tribe1041 | Cristatella(2), Euperipatoides(2), Gallus(20), Paraplanocera(3)             |                                         |                                                                                                                                 |                                                                                   |
| tribe1046 | Euprymna(6?)                                                                | Hydra(~5)                               | Daphnia(3, in-paralog?), Locusta(2, in-paralog)                                                                                 |                                                                                   |
| tribe1047 | Trichinella(20), Carcinus(6), Acanthosciura (10)                            |                                         |                                                                                                                                 |                                                                                   |
| tribe1050 |                                                                             | Ptychodera(3)                           |                                                                                                                                 |                                                                                   |
| tribe1051 | Acanthoscurria(3), Gallus(3), Lumbricus(3)                                  | Xiphinema(1)                            |                                                                                                                                 |                                                                                   |
| tribe1054 |                                                                             |                                         | Onychiurus(2, in-paralog)                                                                                                       |                                                                                   |
| tribe1077 |                                                                             | Turbanella(2)                           | Drosophila(2, divergent, in-paralog)                                                                                            |                                                                                   |
| tribe1081 | Acanthosciura(25)                                                           |                                         |                                                                                                                                 |                                                                                   |
| tribe1099 | Platynereis(6)                                                              |                                         |                                                                                                                                 |                                                                                   |
| tribe1118 | Carcinus(7), Biomphalaria(50)                                               | Trichinella(6)                          |                                                                                                                                 |                                                                                   |
| tribe1121 | Nematostella (10)                                                           | Hydra(1), Carinoma(2), Gnathostomula(2) |                                                                                                                                 |                                                                                   |
| tribe1129 | Trichinella(5)                                                              |                                         |                                                                                                                                 |                                                                                   |
| tribe1132 |                                                                             |                                         |                                                                                                                                 |                                                                                   |
| tribe1136 | Trichinella(20)                                                             | Amoebidium (1)                          |                                                                                                                                 |                                                                                   |
| tribe1162 | Biomphalaria(6), Macrostomum(50)                                            |                                         |                                                                                                                                 |                                                                                   |
| tribe1165 | Brachionus(5)                                                               | Anoplodactylus(3), Asterina(1)          |                                                                                                                                 |                                                                                   |
| tribe1169 | Ptychodera(20), Trichinella(60), Xiphinema(3)                               |                                         |                                                                                                                                 |                                                                                   |
| tribe1170 | Biomphalaria(10), Acanthosciura(10)                                         | Branchiostoma(1), Brachionus(1)         |                                                                                                                                 |                                                                                   |
| tribe1181 | Crassostrea(10)                                                             |                                         |                                                                                                                                 |                                                                                   |
| tribe1187 |                                                                             | Branchiostoma(~10), Hydra(7)            |                                                                                                                                 |                                                                                   |
| tribe1190 |                                                                             | Trichinella(2), Carinoma(1)             |                                                                                                                                 |                                                                                   |
| tribe1200 |                                                                             |                                         |                                                                                                                                 |                                                                                   |
| tribe1204 |                                                                             |                                         |                                                                                                                                 |                                                                                   |
| tribe1244 | Trichinella(intron), Fenneropenaeus(20), Ciona(40)                          |                                         |                                                                                                                                 |                                                                                   |
| tribe1245 |                                                                             |                                         | Hirudo, within Lepidoptera (in-paralog) + 3 divergent sequences (Nematostella, Strongylocentrotus, Laupala, likely, in-paralog) |                                                                                   |
| tribe1292 | Gallus(10), Macrostomum(20)                                                 |                                         | Monosiga (~60 misaligned)                                                                                                       |                                                                                   |
| tribe1294 | Richtersius(30), Branchiostoma(10)                                          |                                         |                                                                                                                                 |                                                                                   |
| tribe1335 |                                                                             |                                         |                                                                                                                                 | Capitella (~20 misaligned), Lumbricus (~40 misaligned), Euprymna (~30 misaligned) |
| tribe1374 | Biomphalaria(10)                                                            |                                         |                                                                                                                                 |                                                                                   |
| tribe1378 |                                                                             | Trichinella(2)                          |                                                                                                                                 |                                                                                   |
| tribe1381 | Gnathostomula(10)                                                           | Hydra(2)                                |                                                                                                                                 |                                                                                   |

| gene      | frameshift                                                                                                                                                                                                           | point mutations                                                                                               | paralogy | contamination/alignment                                  |
|-----------|----------------------------------------------------------------------------------------------------------------------------------------------------------------------------------------------------------------------|---------------------------------------------------------------------------------------------------------------|----------|----------------------------------------------------------|
| tribe1409 | Biomphalaria(10)                                                                                                                                                                                                     |                                                                                                               |          |                                                          |
| tribe143  | Schmidtea(5)                                                                                                                                                                                                         | Acropora(1),<br>Argopecten(2),<br>Crassostrea(2),<br>Hypsibius(1)                                             |          | Symsagitiferra<br>(Chlorophyta)                          |
| tribe1489 |                                                                                                                                                                                                                      | Philodina(1)                                                                                                  |          |                                                          |
| tribe156  | Bugula(10), Carcinoscorpius(4),<br>Monosiga(70), Saccoglossus(55)                                                                                                                                                    | Brachionus(2),<br>Cristatella(1),<br>Hydractinia(12),<br>Oscarella(6),<br>Paraplanocera(4),<br>Platynereis(1) |          |                                                          |
| tribe1646 | Macrostomum(10)                                                                                                                                                                                                      |                                                                                                               |          |                                                          |
| tribe169  | Brachionus(30), Branchiostoma(8),<br>Chaetopleura(10),<br>Echinococcus(50), Euprymna(30),<br>Hydractinia(7), Mnemiopsis(6),<br>Monosiga(20)                                                                          |                                                                                                               |          | Biomphalaria (~50<br>misaligned)                         |
| tribe174  | Asterina(30), Carcinoscorpius(15),<br>Euperipatoides(10), Phoronis(80)                                                                                                                                               | Acanthoscurria (20),<br>Biomphalaria(4),<br>Cristatella(2),<br>Echinoderes(2)                                 |          |                                                          |
| tribe179  | Monosiga(8), Oscarella(10),<br>Trichinella(10), Macrostomum(80),<br>Strongylocentrotus(6),<br>Scutigera(10)                                                                                                          | Trichinella(3), Spadella(1),<br>Crassostrea(1),<br>Carinoma(1),<br>Hypsibius(2),<br>Hydractinia(5)            |          | Neochildia (Microsporidia)                               |
| tribe184  | Acropora(12),Biomphalaria(40),<br>Carcinoscorpius(3),<br>Chaetopleura(3), Echinococcus(5),<br>Euprymna(30), Hydractinia(30),<br>Macrostomum(20), Mytilus(60),<br>Oscarella(10), Symsagitifera(7),<br>Trichinella(75) | Brachionus(2),<br>Xiphiema(10)                                                                                |          |                                                          |
| tribe186  | Amoebidium(30), Capsaspora(40),<br>Oscarella(47)                                                                                                                                                                     | Anoplodactylus(2),<br>Hydractinia(1),<br>Mnemiopsis(2),<br>Monosiga(3),<br>Turbanella(5)                      |          | Carcinoscorpius (~20<br>misaligned)                      |
| tribe193  | Spadella(8)                                                                                                                                                                                                          | Argopecten(1),<br>Echinococcus(5), Homo(3)                                                                    |          |                                                          |
| tribe199  | Dugesia(20)                                                                                                                                                                                                          | Boophilus(2),<br>Chaetopterus(1),<br>Euprymna(2)                                                              |          | Neochildia (Microsporidia)                               |
| tribe200  | Acanthoscurria(5), Acropora(10),<br>Capitella(60),<br>Fenneropenaeus(5),<br>Macrostomum(~10)                                                                                                                         | Chaetopleura(3),<br>Hydractinia(1),<br>Monosiga(5)                                                            |          | Cristatella (~70<br>misaligned)                          |
| tribe211  | Biomphalaria(30)                                                                                                                                                                                                     | Chaetopleura(2),<br>Ptychodera(2), Spadella(2)                                                                |          | Symsagitiferra<br>(Chlorophyta)                          |
| tribe213  |                                                                                                                                                                                                                      | Euprymna(1),<br>Monosiga(3),Sphaeroform<br>a(2), Trichinella(13)                                              |          | Symsagitiferra<br>(Chlorophyta, ~40<br>misaligned)       |
| tribe225  | Biomphalaria(30),<br>Branchiostoma(10),<br>Echinococcus(10),<br>Sphaeroforma(10)                                                                                                                                     | Spadella(1), Trichinella(1)                                                                                   |          |                                                          |
| tribe226  | Euprymna(7)                                                                                                                                                                                                          | Cerebratulus(2)                                                                                               |          |                                                          |
| tribe232  | Acropora(8), Amoebidium(2),<br>Aplysia(14), Capitella(10),<br>Capsaspora(6),<br>Fenneropenaeus(13), Gallus(5),<br>Myzostoma(15),<br>Strongylocentrotus(6)                                                            | Cyanea(3),<br>Macrostomum(5)                                                                                  |          | Trichinella (Ascaris)                                    |
| tribe233  | Anoplodactylus(intron), Capitella(7)                                                                                                                                                                                 |                                                                                                               |          |                                                          |
| tribe235  | Boophilus(10), Ciona(intron),<br>Gallus(20), Strongylocentrotus(10)                                                                                                                                                  |                                                                                                               |          | Neochildia (Microsporidia)                               |
| tribe236  | Fenneropenaeus(25)                                                                                                                                                                                                   | Biomphalaria(1)                                                                                               |          |                                                          |
| tribe241  | Aplysia(5), Capsaspora(4),<br>Mytilus(18)                                                                                                                                                                            |                                                                                                               |          |                                                          |
| tribe242  | Argopecten(12), Biomphalaria(4),<br>Crassostrea(20)                                                                                                                                                                  |                                                                                                               |          |                                                          |
| tribe243  | Cyanea(5), Scutigera(3)                                                                                                                                                                                              | Anoplodactylus(2),<br>Echinoderes(2)                                                                          |          | Macrostomum(choano?),<br>Symsagitiferra<br>(Chlorophyta) |

| gene     | frameshift                                                                                               | point mutations                                                                                              | paralogy                                                                                                          | contamination/alignment                                                                                                                   |
|----------|----------------------------------------------------------------------------------------------------------|--------------------------------------------------------------------------------------------------------------|-------------------------------------------------------------------------------------------------------------------|-------------------------------------------------------------------------------------------------------------------------------------------|
| tribe260 | Acropora(3), Haementeria(4),<br>Phoronis(7), Trichinella(30),<br>Schmidtea(12),<br>Strongylocentrotus(5) | Branchiostoma(3)                                                                                             |                                                                                                                   |                                                                                                                                           |
| tribe263 | Crassostrea(120),<br>Fenneropenaeus(8), Euprymna(15),<br>Capitella(6)                                    | Saccoglossus(10, bad<br>genetic code),<br>Echinococcus(6),<br>Paraplanocera(12),<br>Dugesia(5), Asterina(11) |                                                                                                                   | Hydra(Artemia)                                                                                                                            |
| tribe268 |                                                                                                          |                                                                                                              |                                                                                                                   |                                                                                                                                           |
| tribe271 |                                                                                                          |                                                                                                              |                                                                                                                   |                                                                                                                                           |
| tribe272 |                                                                                                          | Acropora(2), Capitella(20),<br>Echinococcus(1),<br>Pedicellina(1),<br>Platynereis(4)                         |                                                                                                                   |                                                                                                                                           |
| tribe273 | Monosiga(10)                                                                                             | Trichinella(1),<br>Turbanella(2)                                                                             |                                                                                                                   | Priapulid (Phoronis)                                                                                                                      |
| tribe279 |                                                                                                          | Acanthoscurria(10),<br>Cryptococcus(6)                                                                       |                                                                                                                   | Neochilidia (Microsporidia)                                                                                                               |
| tribe281 | Asterina(5), Trichinella(5)                                                                              | Oscarella(2),<br>Schmidtea(1)                                                                                | Tribolium (2)                                                                                                     |                                                                                                                                           |
| tribe287 | Argopecten(17), Ciona(5)                                                                                 | Monosiga(1),<br>Paraplanocera(1)                                                                             |                                                                                                                   | Symsagittifera (Ciliates)                                                                                                                 |
| tribe288 | Dugesia(3), Strongylocentrotus(25),<br>Themiste(intron)                                                  | Capsaspora(52)                                                                                               |                                                                                                                   | Symsagittifera<br>(Ancyromonas)                                                                                                           |
| tribe299 | Chaetopleura(7)                                                                                          | Anoplodactylus(1),<br>Biomphalaria(1),<br>Euperipatoides(1),<br>Gnathostomula(2),<br>Xiphinema(3)            |                                                                                                                   | Symsagittifera<br>(Chlorophyta?)                                                                                                          |
| tribe305 | Daphnia(20)                                                                                              | Brachionus(2),<br>Chaetopleura(2),<br>Cyanea(1),<br>Echinococcus(1),<br>Scutigera(3)                         |                                                                                                                   | Symsagittifera (Ciliates)                                                                                                                 |
| tribe319 | Anoplodactylus(6)                                                                                        | Euperipatoides(1),<br>Hydractinia(5)                                                                         |                                                                                                                   |                                                                                                                                           |
| tribe320 | Anoplodactylus(2)                                                                                        | Crassostrea(1)                                                                                               |                                                                                                                   | Symsagittifera (Cnidaria?)                                                                                                                |
| tribe321 |                                                                                                          | Chaetopleura(2)                                                                                              |                                                                                                                   | Acanthoscurria (Triticum)                                                                                                                 |
| tribe325 | Biomphalaria(13), Haementeria(50),<br>Macrostomum(10)                                                    | Aplysia(4)                                                                                                   |                                                                                                                   | Branchiostoma (not clear<br>donor)                                                                                                        |
| tribe330 | Argopecten(4), Crassostrea(40),<br>Fenneropenaeus(4)                                                     | Strongylocentrotus (24),<br>Ptychodera(3), Cyanea(7),<br>Daphnia(2),<br>Paraplanocera(5),<br>Schmidtea(6)    |                                                                                                                   | Dugesia (Gallus),<br>Xiphinema (Lumbricus),<br>Asterina (~60<br>misaligned), Cyanea (~60<br>misaligned), Nematostella<br>(~40 misaligned) |
| tribe333 | Flaccisagitta(30), Capsaspora(10),<br>Euprymna(10)                                                       | Biomphalaria(2)                                                                                              | Paracentrotus+Strongylocentro<br>tus (3, in-paralog),<br>Saccoglossus(3) and several<br>others (drosophila, etc.) |                                                                                                                                           |
| tribe340 | Aplysia(10)                                                                                              |                                                                                                              |                                                                                                                   |                                                                                                                                           |
| tribe345 | Acropora(12), Ciona(5),<br>Dugesia(21)                                                                   |                                                                                                              |                                                                                                                   |                                                                                                                                           |
| tribe351 | Euperipatoides(5), Hydractinia(10)                                                                       | Turbanella(1)                                                                                                |                                                                                                                   | Priapulid (Alveolata)                                                                                                                     |
| tribe352 | Biomphalaria(25), Crassostrea(4),<br>Daphnia(5), Echinococcus(7)                                         | Sphaeroforma(20),<br>Spinichordodes(10)                                                                      |                                                                                                                   |                                                                                                                                           |
| tribe355 |                                                                                                          | Argopecten(2),<br>Branchiostoma(2),<br>Euperipatoides(2)                                                     |                                                                                                                   |                                                                                                                                           |
| tribe356 | Brachionus(15),<br>Chaetoderma(15), Mytilus(4)                                                           | Chaetopleura(2),<br>Echinoderes(1),<br>Gnathostomula(1),<br>Trichinella(3),<br>Turbanella(1)                 |                                                                                                                   | Symsagittifera<br>(Amoebozoa?)                                                                                                            |

| gene     | frameshift                                                                                                          | point mutations                                                                    | paralogy                                                                                               | contamination/alignment                                                                                          |
|----------|---------------------------------------------------------------------------------------------------------------------|------------------------------------------------------------------------------------|--------------------------------------------------------------------------------------------------------|------------------------------------------------------------------------------------------------------------------|
| tribe368 | Aplysia(10), Mytilus(60), Saccoglossus(5)                                                                           | Saccoglossus(17, bad genetic code), Ciona(82), Schmidtea(7), Euperipatoides(7)     |                                                                                                        | Ptychodera (~200 misaligned)                                                                                     |
| tribe369 |                                                                                                                     | Fenneropenaeus(3), Asterina(21)                                                    |                                                                                                        | Hydra (Artemia), Saccoglossus (Mus)                                                                              |
| tribe380 | Lumbricus(10), Chaetopterus(5)                                                                                      | Saccoglossus(10, bad genetic code), Ciona(62), Paraplanocera(16)                   |                                                                                                        |                                                                                                                  |
| tribe400 | Flaccisagitta (25), Schmidtea(110)                                                                                  | Fenneropenaeus(4), Asterina(34, bad code), Ptychodera(5), Dugesia(9), Boophilus(3) |                                                                                                        | Saccoglossus (Mus), Dugesia (Gallus)                                                                             |
| tribe435 | Scutigera(3), Xiphinema(30)                                                                                         | Anoplodactylus(1), Xiphinema(~5)                                                   |                                                                                                        |                                                                                                                  |
| tribe460 | Eupryma(40)                                                                                                         | Chaetopterus(1), Eupryma(30), Trichinella(2), Richtersius(3)                       |                                                                                                        | Strongylocentrotus (chimerical gene, the first 40 amino acids are from Rho guanine nucleotide exchange factor 3) |
| tribe495 | Carcinus(5), Trichinella(20), Biomphalaria(3)                                                                       | Euprymna(1), Monosiga(3), Schmidtea(1), Amoebidium(5)                              |                                                                                                        |                                                                                                                  |
| tribe507 | Biomphalaria(10), Mytilus(6)                                                                                        | Daphnia(1), Turbanella(2)                                                          |                                                                                                        |                                                                                                                  |
| tribe508 |                                                                                                                     | Trichinella(3), Xiphinema(1), Richtersius(1)                                       |                                                                                                        |                                                                                                                  |
| tribe532 | Oscarella(4)                                                                                                        |                                                                                    |                                                                                                        |                                                                                                                  |
| tribe542 | Cerebratulus (~10)                                                                                                  | Bugula(1)                                                                          | Schmidtea(divergent, in-paralog)                                                                       |                                                                                                                  |
| tribe550 |                                                                                                                     |                                                                                    | several paralogs (without clear structure)                                                             |                                                                                                                  |
| tribe572 | Capsaspora(8), Branchiostoma (6), Aplysia(10), M. ovata(10)                                                         | Branchiostoma(2)                                                                   | Rhodnius, Hymenoptera(divergent, in-paralog?), Brugia (in-paralog), Tribolium (divergent, in-paralog?) |                                                                                                                  |
| tribe585 | Macrostomum(5), Gallus (~30)                                                                                        | Hypsibius(7)                                                                       | duplication at the base of Hexapoda                                                                    |                                                                                                                  |
| tribe586 |                                                                                                                     |                                                                                    | Caenorhabditis (divergent, in-paralog?)                                                                |                                                                                                                  |
| tribe593 | Capitella(10), Chaetopterus(intron)                                                                                 |                                                                                    |                                                                                                        |                                                                                                                  |
| tribe613 | Ferrenopenaeus(3)                                                                                                   |                                                                                    | Apis                                                                                                   |                                                                                                                  |
| tribe619 | Ferrenopenaeus(10)                                                                                                  | Acropora(1)                                                                        |                                                                                                        |                                                                                                                  |
| tribe622 | Biomphalaria(20)                                                                                                    |                                                                                    |                                                                                                        | Trichinella (Pseudomonas)                                                                                        |
| tribe629 | Echinococcus(3), Strongylocentrotus(3), Mytilus(3)                                                                  | Gnathostomula(1), Branchiostoma(10)                                                |                                                                                                        |                                                                                                                  |
| tribe632 |                                                                                                                     |                                                                                    | numerous divergent copies in Hexapoda and Nematoda                                                     |                                                                                                                  |
| tribe646 | Spinochordodes(6), Biomphalaria(3)                                                                                  | Acanthoscurria(1)                                                                  |                                                                                                        |                                                                                                                  |
| tribe647 | Macrostomum(2)                                                                                                      | Branchiostoma(10)                                                                  |                                                                                                        |                                                                                                                  |
| tribe683 | Turbanella(10)                                                                                                      | Mnemioopsis(3)                                                                     | Ixodes (3, in-paralog), Saccoglossus(3), Folsomia(2), Lumbricus(2), several hexapoda, many others      | Symsagittifera (Cyanobacteria)                                                                                   |
| tribe686 |                                                                                                                     |                                                                                    | many species                                                                                           |                                                                                                                  |
| tribe696 | Trichinella(5)                                                                                                      | Strongylocentrotus(1)                                                              |                                                                                                        |                                                                                                                  |
| tribe700 | Oscarella(40)                                                                                                       |                                                                                    | bombyx (2, divergent, in-paralog?)                                                                     |                                                                                                                  |
| tribe703 | Crassostrea(50), Echinococcus(10), Gallus(~10), Lumbricus(4), Macrostomum(~25), Symsagittifera(11), Trichinella(10) | Hydra(1), Shaeroforma(2)                                                           |                                                                                                        |                                                                                                                  |
| tribe716 | Hydra(10), Euprymna(10)                                                                                             |                                                                                    |                                                                                                        | Acanthoscurria (angiosperm, + frameshift of 68 aa)                                                               |
| tribe717 | Daphnia(7)                                                                                                          | Hydractinia(4)                                                                     | Drosophila(2)                                                                                          |                                                                                                                  |
| tribe726 |                                                                                                                     |                                                                                    | Brugia(2), Mammalia(2), mosquitoes(2)                                                                  |                                                                                                                  |
| tribe739 | Ferrenopenaeus(4)                                                                                                   | Euperipatoides(1)                                                                  | Myzus(2), Drosophila(2)                                                                                |                                                                                                                  |
| tribe740 | Euprymna(5)                                                                                                         | Mytilus(1)                                                                         |                                                                                                        |                                                                                                                  |
| tribe742 |                                                                                                                     | Asterina(1), Crassostrea(2)                                                        | Tribolium(2), Vertebrata(2), Platyhelminthes(2), Symsagittifera(2)                                     |                                                                                                                  |
| tribe756 |                                                                                                                     | Monosiga(3)                                                                        | Helobdella(2), Drosophila(2)                                                                           |                                                                                                                  |
| tribe764 | Aplysia(6)                                                                                                          |                                                                                    | Coleoptera(2)                                                                                          |                                                                                                                  |
| tribe765 | Trichinella(6)                                                                                                      |                                                                                    | Capitella(2)                                                                                           |                                                                                                                  |
| tribe766 |                                                                                                                     |                                                                                    |                                                                                                        | Carcinoscorpius (~10 misaligned), Carcinus (~10 misaligned)                                                      |

| gene     | frameshift                                                                             | point mutations                                                    | paralogy                                                              | contamination/alignment                                |
|----------|----------------------------------------------------------------------------------------|--------------------------------------------------------------------|-----------------------------------------------------------------------|--------------------------------------------------------|
| tribe768 | Homo(5)                                                                                | Branchiostoma(2)                                                   |                                                                       |                                                        |
| tribe782 | Gallus(5), Biomphalaria(10),<br>Euperipatoides(4)                                      |                                                                    |                                                                       |                                                        |
| tribe783 | Chaetopleura(3)                                                                        | Anoplodactylus(2)                                                  |                                                                       |                                                        |
| tribe793 | Crassostrea(2), Biomphalaria(40)                                                       | Mnemiopsis(1)                                                      |                                                                       |                                                        |
| tribe801 | Argopecten(10)                                                                         |                                                                    | Nematostella(2, divergent),<br>Insecta(several)                       |                                                        |
| tribe805 | Drosophila(2), Echinococcus(5)                                                         | Crassostrea(2),<br>Daphnia(1), Oscarella(3)                        |                                                                       |                                                        |
| tribe831 |                                                                                        |                                                                    |                                                                       |                                                        |
| tribe832 | Macrostomum(20), Xenoturbella(4),<br>Euprymna(20), Fenneropenaeus(20)                  | Themiste(2), Mytilus(2)                                            | Drosophila(2, divergent)                                              |                                                        |
| tribe833 | Branchiostoma(15),<br>Cryptococcus(8), Hypsibius(30),<br>Mnemiopsis(3), Trichinella(5) | Acanthoscurria(1)                                                  |                                                                       |                                                        |
| tribe850 | Dugesia(2), Boophilus(20)                                                              | Amoebidium (7)                                                     |                                                                       |                                                        |
| tribe852 | Symsagittifera(4)                                                                      | Branchiostoma(1)                                                   |                                                                       |                                                        |
| tribe858 |                                                                                        | Branchiostoma(2),<br>Schmidtea(1)                                  | many many paralogs                                                    | Asterina (Bacteria)                                    |
| tribe861 | Cristatella(4), Schmidtea(2)                                                           |                                                                    |                                                                       |                                                        |
| tribe868 |                                                                                        |                                                                    |                                                                       |                                                        |
| tribe893 |                                                                                        |                                                                    | Monosiga(2)                                                           |                                                        |
| tribe895 | Branchiostoma(3), Biomphalaria(70)                                                     |                                                                    |                                                                       |                                                        |
| tribe896 | Xiphinema(10), Lumbricus(3)                                                            |                                                                    |                                                                       | Symsagittifera<br>(Chlorophyta)                        |
| tribe905 |                                                                                        | Echinococcus(1)                                                    | Caenorhabditis(2,in),<br>Prisrionchus(2,in),<br>Drosophila(divergent) |                                                        |
| tribe906 |                                                                                        | Crassostrea(5)                                                     | Drosophila(2, divergent),<br>Mammalia(2)                              |                                                        |
| tribe916 |                                                                                        | Echinococcus(1)                                                    |                                                                       | Symsagittifera<br>(Prokaryota), Monosiga<br>(Rhizopus) |
| tribe927 | Aplysia(3)                                                                             | Branchiostoma(2)                                                   | Lepidoptera(2)                                                        |                                                        |
| tribe930 | Eupryma(3)                                                                             | Biomphalaria(1)                                                    | Myzus(2)                                                              |                                                        |
| tribe942 |                                                                                        | Boophilus(50),<br>Branchiostoma(1)                                 | Drosophila(2, divergent)                                              | Oscarella (Pseudomonas)                                |
| tribe961 | Hydractinia(6)                                                                         | Cristatella(2), Crassostrea(1),<br>Aplysia(5),<br>Gnathostomula(2) | Helobdella(2, divergent)                                              |                                                        |
| tribe965 |                                                                                        |                                                                    |                                                                       |                                                        |
